# Supplementary material
Source: PubMed Central journal article supplement (PMC8274759)
Supplement: tpmd201459.SD1.pdf [file tpmd201459.SD1.pdf]

**Supplemental Figure 1. Health catchment specific incidence of primary health presentations for scabies and bacterial skin examinations.**

The colour of the bars indicates the subdivision of the health catchments with red indicating Macuata; blue, Cakaudrove; green, Taveuni and yellow, Bua. The orange stacked bar represents the adjusted incidence of the health catchment if reporting was incomplete for the full 50 weeks of surveillance. Labasa and Vuna health catchments are serviced by more than one facility: Labasa health catchment contains Labasa Hospital, Labasa Health Centre and Nasea Health Centre. Vuna health catchment contains Vuna Health Centre and Vuna Nursing Station.

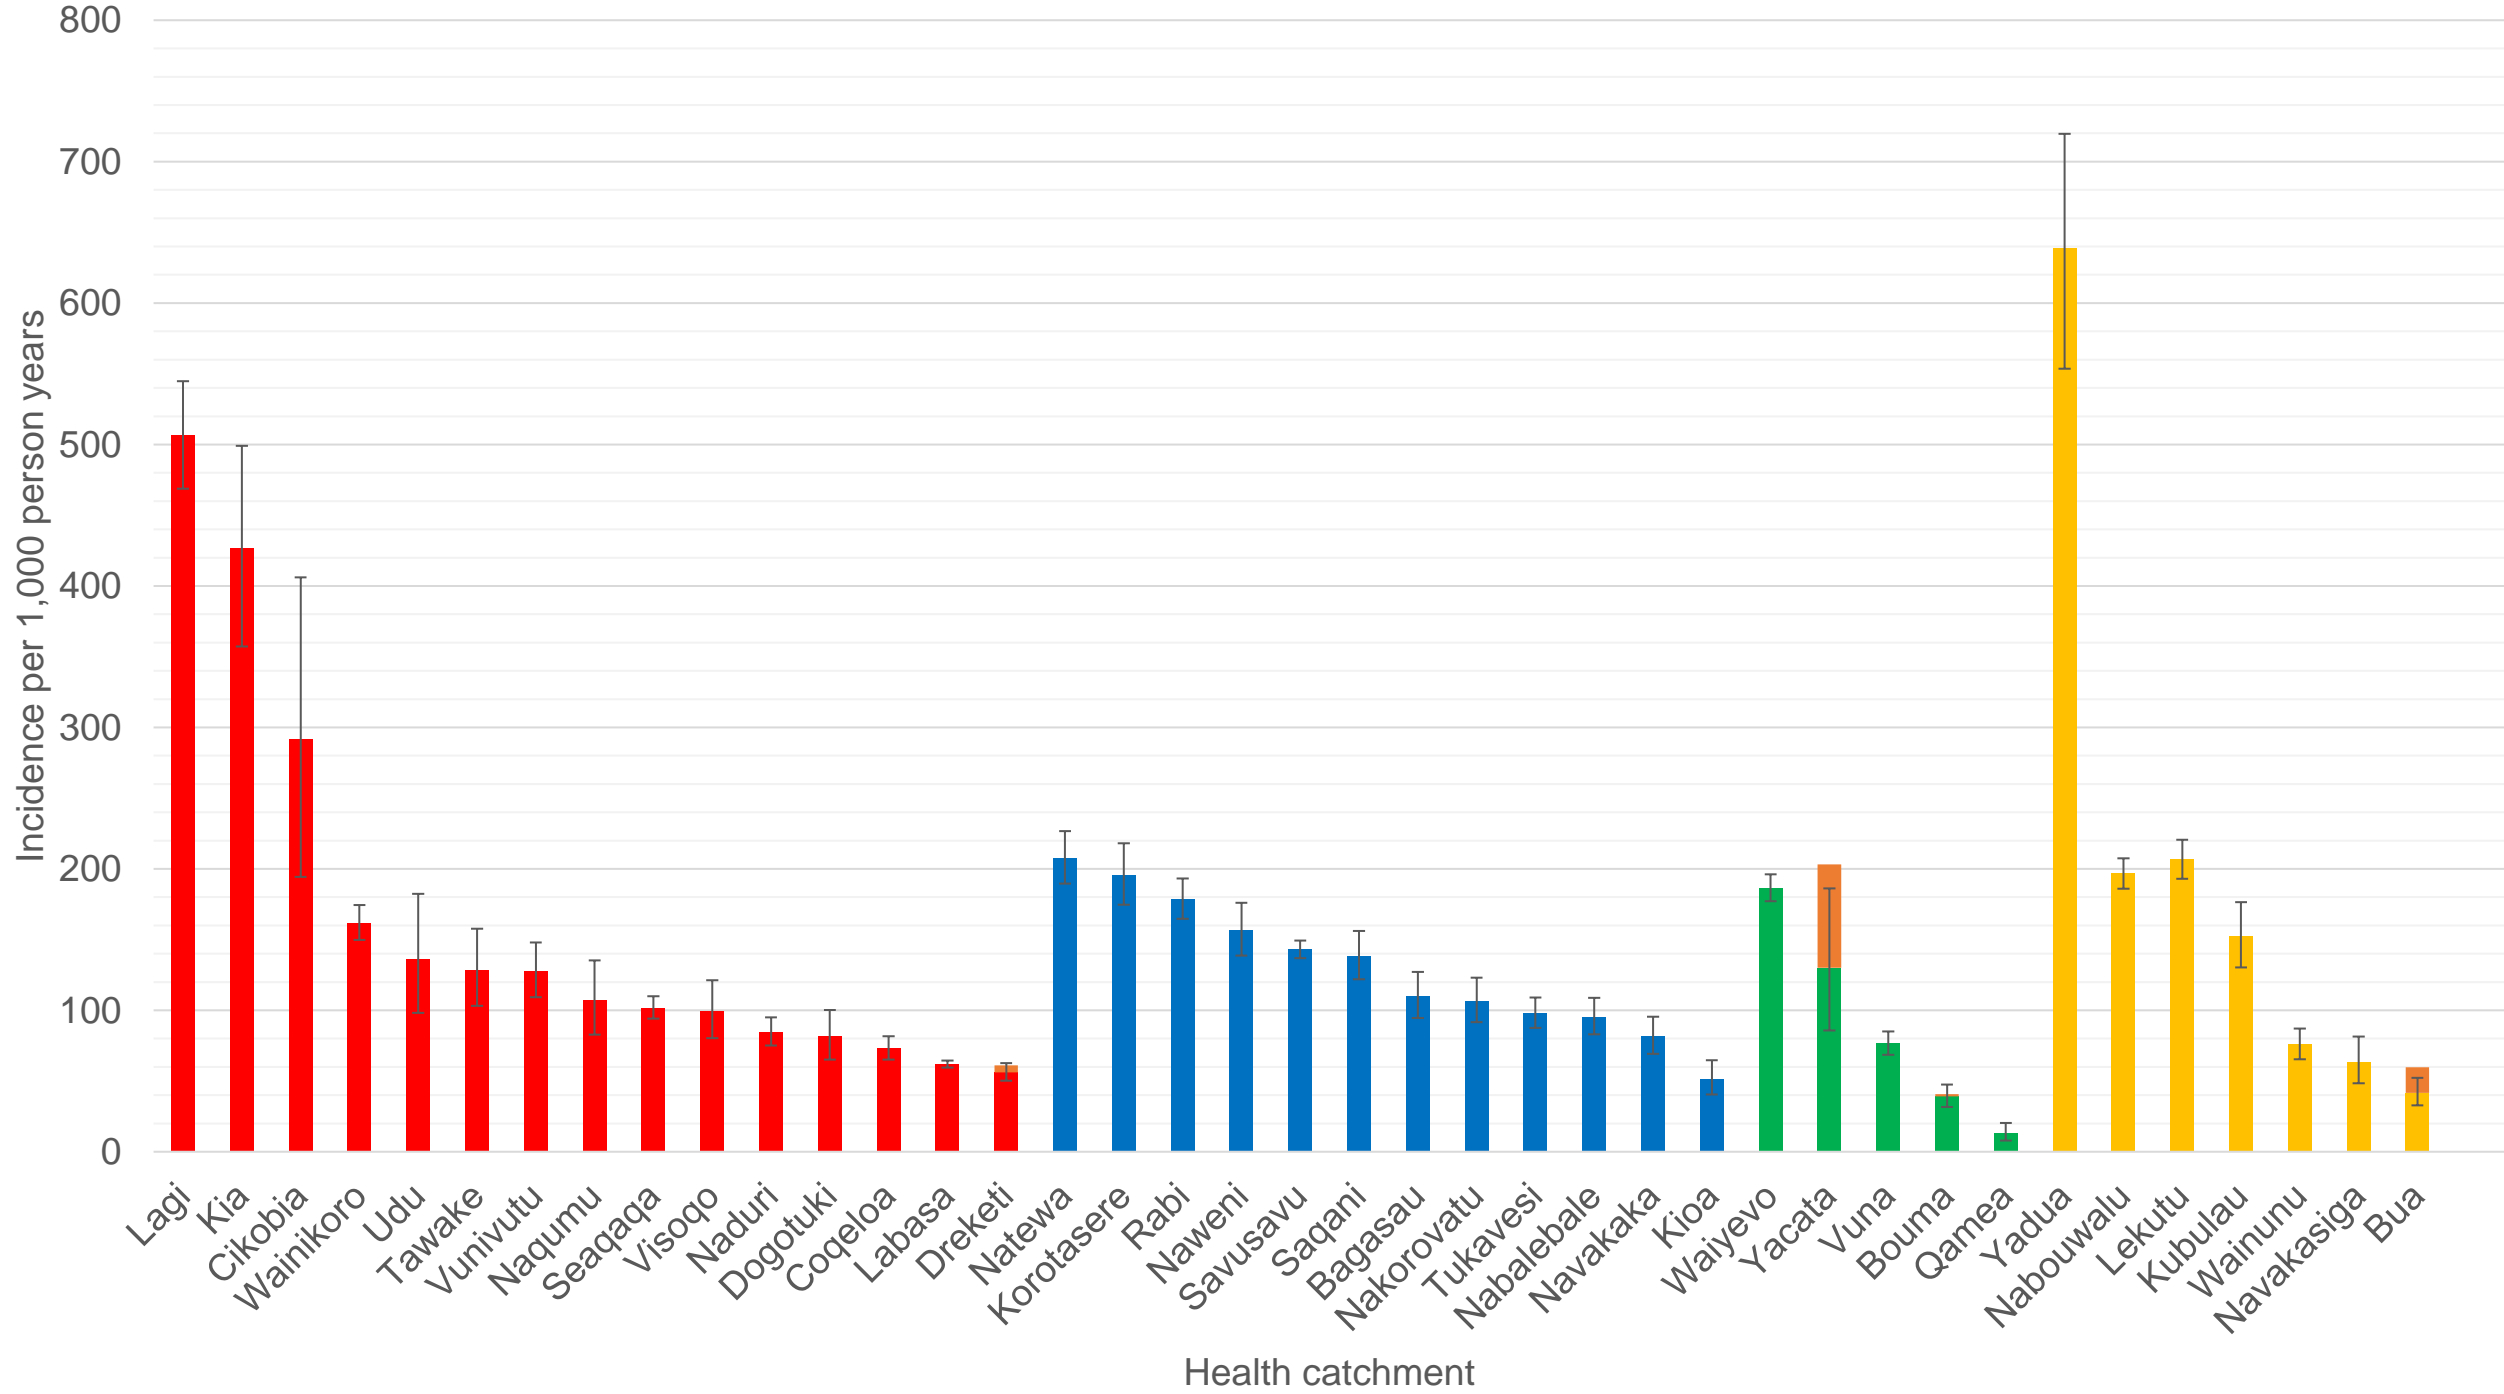

**Supplemental Table 1. Number and proportion of cases detected through different modes of primary healthcare.** IMCI stands for Integrated Management of Childhood Illness.

|                                      | <b>General<br/>outpatient<br/>clinic</b> | <b>IMCI<br/>clinic</b> | <b>School<br/>visits</b> | <b>Community<br/>outreach</b> | <b>Emergency<br/>department</b> | <b>Total</b>   |
|--------------------------------------|------------------------------------------|------------------------|--------------------------|-------------------------------|---------------------------------|----------------|
| Scabies<br>N (%)                     | 1646<br>(45.2)                           | 1440<br>(39.5)         | 379<br>(10.4)            | 162<br>(4.5)                  | 16<br>(0.4)                     | 3643<br>(100)  |
| Impetigo<br>N (%)                    | 1007<br>(36.8)                           | 1598<br>(58.4)         | 52<br>(1.9)              | 73<br>(2.7)                   | 8<br>(0.3)                      | 2738<br>(100)  |
| Abscess<br>N (%)                     | 6163<br>(76.5)                           | 1401<br>(17.4)         | 260<br>(3.2)             | 88<br>(1.1)                   | 140<br>(1.7)                    | 8052<br>(100)  |
| Cellulitis<br>N (%)                  | 347<br>(83.4)                            | 47<br>(11.3)           | 2<br>(0.5)               | 6<br>(1.4)                    | 14<br>(3.4)                     | 416<br>(100)   |
| Severe<br>skin<br>condition<br>N (%) | 124<br>(66.7)                            | 52<br>(28)             | 5<br>(2.7)               | 2<br>(1.1)                    | 3<br>(1.6)                      | 186<br>(100)   |
| Overall<br>N (%)                     | 8591<br>(62.5)                           | 4052<br>(29.5)         | 640<br>(4.7)             | 278<br>(2)                    | 175<br>(1.3)                    | 13736<br>(100) |

**Supplemental Table 2. Incidence and proportion of scabies that was infected by age group.** Incidence is expressed per 1,000 person years. The total includes cases with missing data for age of which there are 6 cases for infected scabies and 22 cases for scabies.

| <b>Age group</b> | <b>Number with infected scabies</b> | <b>Number with scabies</b> | <b>Incidence (95%CI)</b> | <b>% Infected</b>       |
|------------------|-------------------------------------|----------------------------|--------------------------|-------------------------|
| 0-4              | 555                                 | 1786                       | 39.7 (36.5-43)           | 31.1 (28.9-33.3)        |
| 5-14             | 427                                 | 1418                       | 16.2 (14.7-17.8)         | 30.1 (27.8-32.6)        |
| 15-24            | 72                                  | 157                        | 3.8 (2.9-4.7)            | 45.9 (37.9-54)          |
| 25-34            | 20                                  | 64                         | 1.1 (0.7-1.8)            | 31.3 (20.2-44.1)        |
| 35-44            | 11                                  | 46                         | 0.7 (0.3-1.2)            | 23.9 (12.6-38.8)        |
| 45-54            | 16                                  | 42                         | 1.1 (0.6-1.8)            | 38.1 (23.6-54.4)        |
| 55-64            | 8                                   | 50                         | 0.8 (0.3-1.5)            | 16 (7.2-29.1)           |
| >=65             | 18                                  | 58                         | 2.4 (1.4-3.7)            | 31 (19.5-44.5)          |
| <b>Total</b>     | <b>1133</b>                         | <b>3643</b>                | <b>8.9 (8.4-9.5)</b>     | <b>31.1 (29.6-32.6)</b> |

**Supplemental Table 3. Incidence of primary health presentations with scabies and skin and soft tissue infection by subdivision.** Incidence is expressed per 1,000 population per year, incidence rate ratio is calculated using Macuata as reference. CI stands for confidence intervals.

| Subdivision | Population | Number of presentations | Incidence (95% CI)        | Incidence rate ratio |
|-------------|------------|-------------------------|---------------------------|----------------------|
| Macuata     | 65978      | 5261                    | 82.93<br>(80.79-85.11)    | (ref)                |
| Taveuni     | 15454      | 1708                    | 114.94<br>(109.84-120.19) | 1.39<br>(1.36-1.41)  |
| Cakaudrove  | 34993      | 4459                    | 132.52<br>(128.91-136.20) | 1.6<br>(1.58-1.62)   |
| Bua         | 15489      | 2308                    | 154.97<br>(149.17-160.90) | 1.87<br>(1.84-1.90)  |
| Total       | 131914     | 13736                   | 108.29<br>(106.58-110.02) | 1.31<br>(1.29-1.32)  |
